# Supplementary material for: A very limited role of tropospheric chlorine as a sink of the greenhouse gas methane
Source: Copernicus journal article supplement (doi:10.5194/acp-18-9831-2018), 2018-07-12
Supplement: Supplementary file 1 [file acp-18-9831-2018-supplement.pdf]

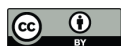

*Supplement of*

**A very limited role of tropospheric chlorine as a sink of the greenhouse gas methane**

**Sergey Gromov et al.**

*Correspondence to:* Sergey Gromov ([sergey.gromov@mpic.de](mailto:sergey.gromov@mpic.de))

The copyright of individual parts of the supplement might differ from the CC BY 4.0 License.



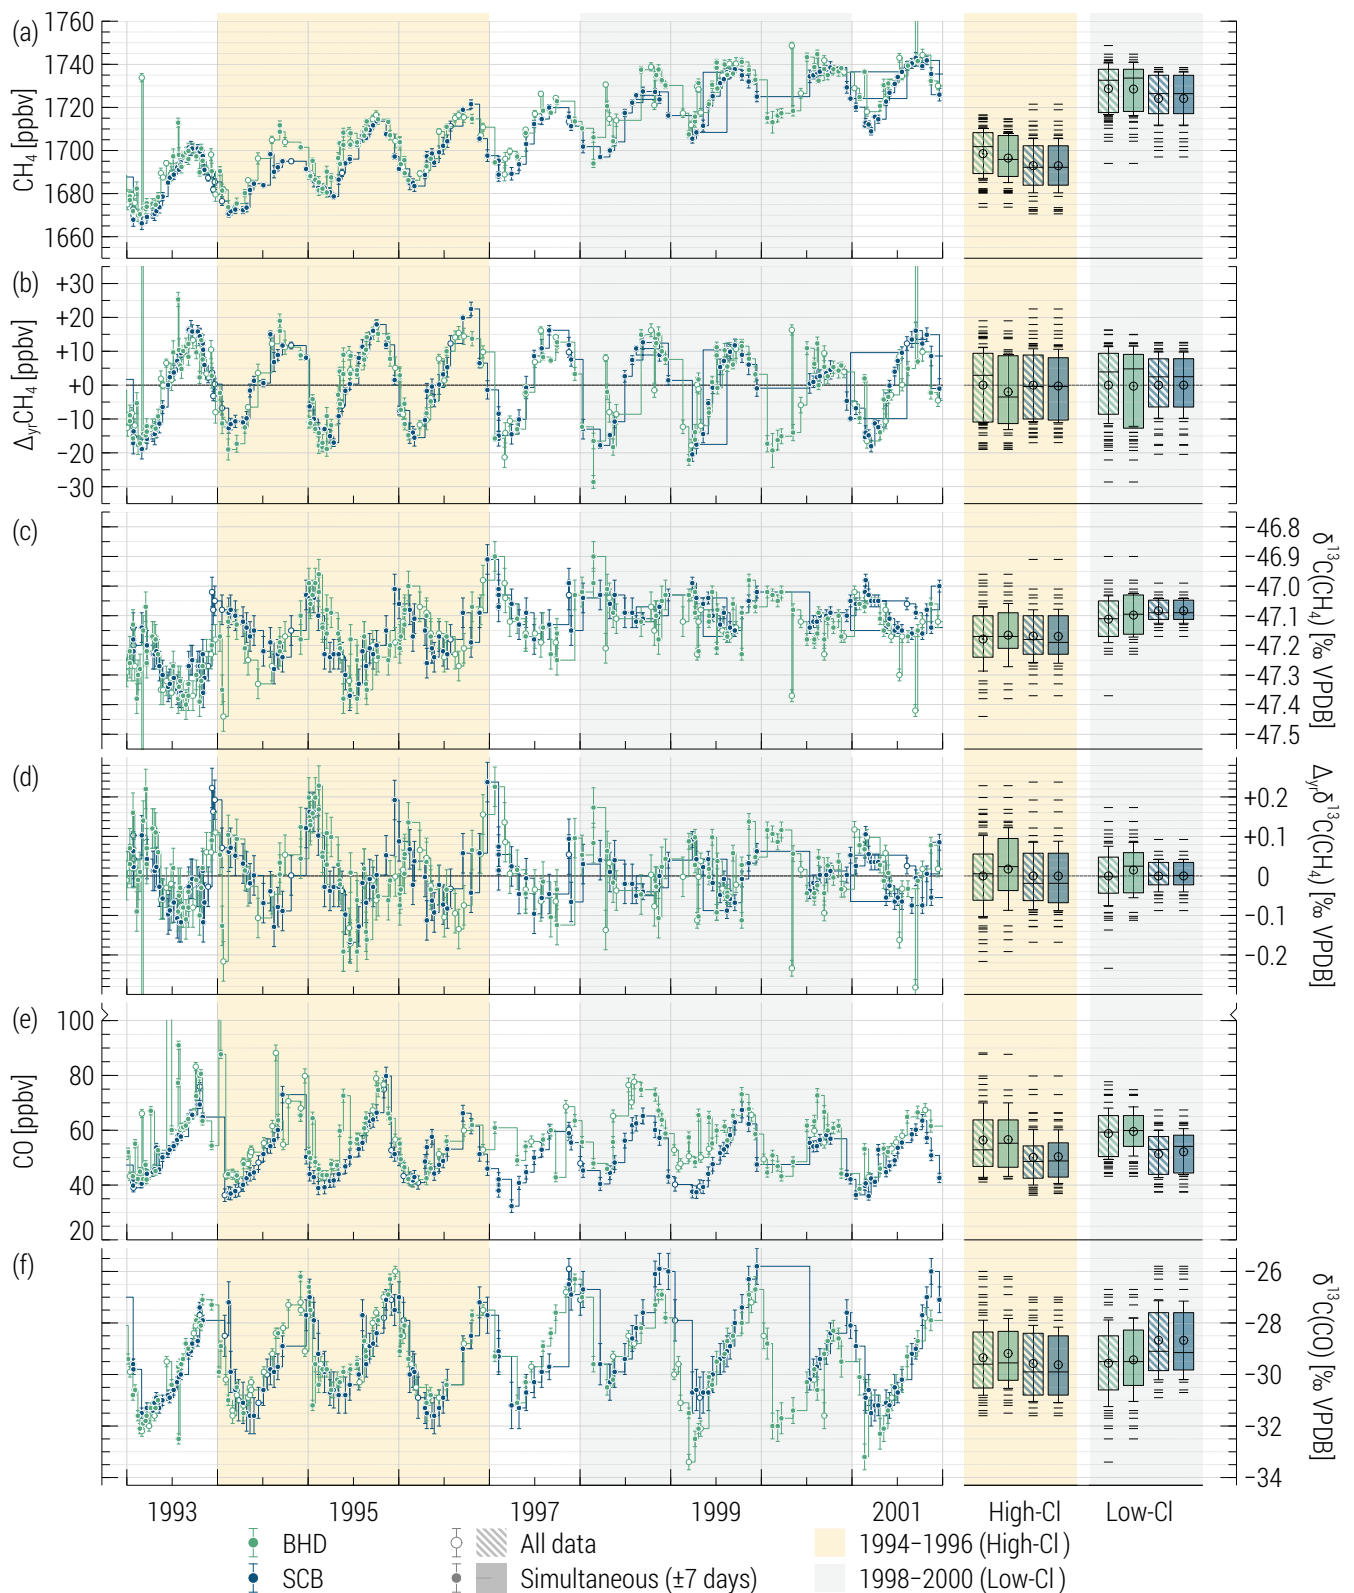

Fig. S2 Time series (left) and statistics (right, box-and-whisker plots) of the observations from Baring Head (BHD) and Scott Base (SCB) scrutinised in this study. Panels (a, c) present the mixing ratios and  $\delta^{13}\text{C}$  of  $\text{CH}_4$ ; panels (b, d) show anomalies with respect to the annual averages (denoted with “ $\Delta_{\text{yr}}$ ”). Panels (e, f) display the mixing ratios and  $\delta^{13}\text{C}$  of CO. The number of samples in each subset is presented in the manuscript (Fig. 1, panel (g)). Shaded areas denote the ETSH MBL high-Cl (orange shaded) and low-Cl (grey shaded) periods hypothesised by A07 (see text for details). Step lines navigate through the entire time series at each station. Boxes and whiskers present the median/interquartile range and  $\pm 1\sigma$  (of the population) of the selected data. Circles and minus symbols denote the averages and samples falling outside  $\pm 1\sigma$ , respectively. Solid symbols/boxes refer to the data when  $\text{CH}_4$  and CO samples were taken simultaneously (up to 7 days apart); hollow symbols/hatched boxes refer to all data.

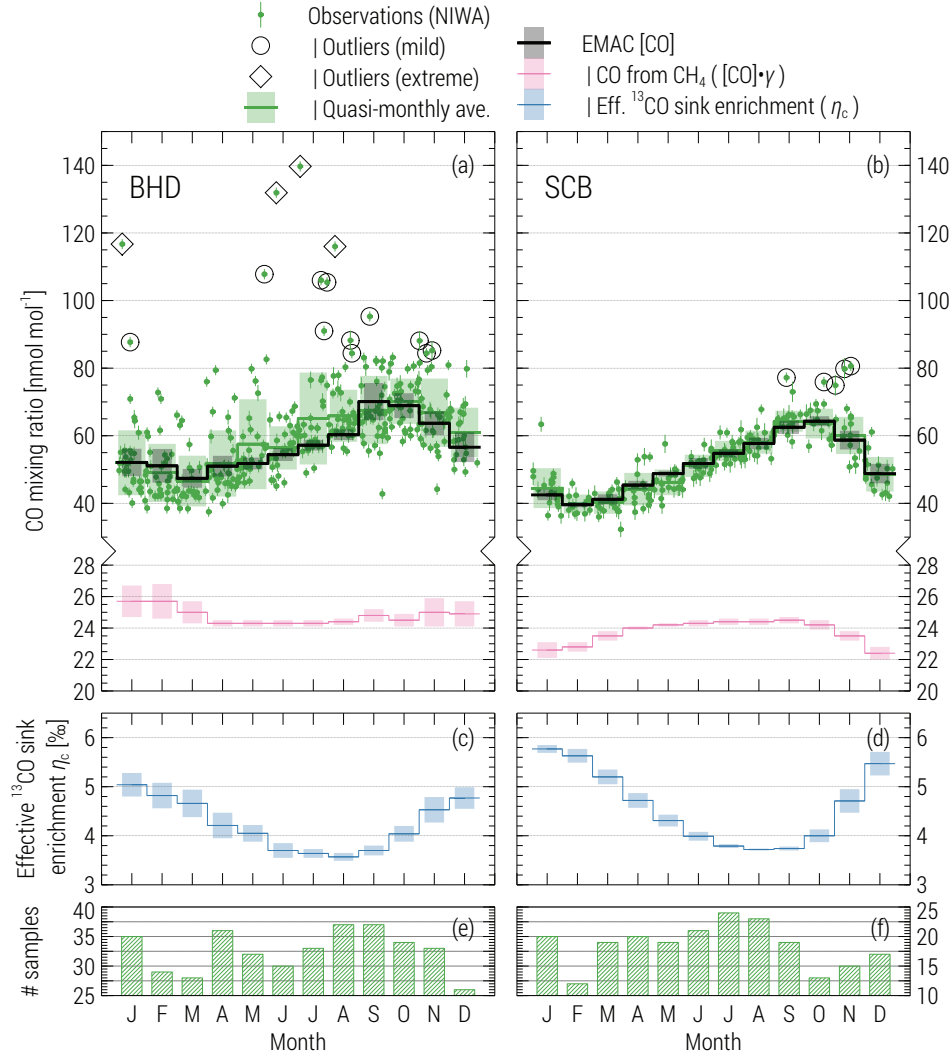

Fig. S3 Seasonal cycles CO mixing ratio at Baring Head (BHD, panel **a**) and Scott Base (SCB, panel **b**). Observations (entire data series plotted against day of year) are shown with symbols; circles and diamonds denote mild and extreme outliers (see Sect. 2.2 of the manuscript for details). Step lines refer to quasi-monthly averages derived from the observations (green) and from the EMAC model (1996–2005) for total CO (black) and its component derived from CH<sub>4</sub> oxidation (thin red line, lower scale). Panels **(c, d)** present the simulated effective sink  $^{13}\text{CO}$  enrichment, respectively. Vertical bars indicate  $\pm 1\sigma$  of the subsample used for quasi-monthly averages. Panels **(e, f)** show the number of samples in observational data. Mind the breaks and different scales of the ordinate axes.

Table S1 Annual average CO- and CH<sub>4</sub>-related integrals by domain simulated in EMAC for 1996–2005.

| domain               | zonal                                              |        |                                              |       |       |       |                                                         |                                               |       |       |       |       |  |
|----------------------|----------------------------------------------------|--------|----------------------------------------------|-------|-------|-------|---------------------------------------------------------|-----------------------------------------------|-------|-------|-------|-------|--|
| vertical             | GLOB                                               | ETNH   | IT                                           | ETSH  | AR    | AN    | GLOB                                                    | ETNH                                          | IT    | ETSH  | AR    | AN    |  |
|                      | CO burden [Tg(C)]                                  |        |                                              |       |       |       | Fraction of CO from CH <sub>4</sub> oxidation   γ [C/C] |                                               |       |       |       |       |  |
| SRF                  | 1.80                                               | 0.70   | 0.86                                         | 0.24  | 0.09  | 0.03  | 24.6%                                                   | 17.1%                                         | 25.2% | 44.8% | 19.3% | 46.0% |  |
| BL                   | 12.71                                              | 5.07   | 5.87                                         | 1.77  | 0.52  | 0.19  | 25.7%                                                   | 17.5%                                         | 27.2% | 44.5% | 18.9% | 45.8% |  |
| MBL                  | 6.39                                               | 1.67   | 3.31                                         | 1.40  | 0.20  | 0.05  | 32.5%                                                   | 19.9%                                         | 33.5% | 45.2% | 19.0% | 45.8% |  |
| FT                   | 135.71                                             | 46.82  | 68.13                                        | 20.75 | 7.45  | 2.42  | 29.5%                                                   | 21.2%                                         | 31.0% | 43.6% | 20.1% | 45.4% |  |
| T                    | 151.30                                             | 53.09  | 75.23                                        | 22.98 | 8.13  | 2.67  | 29.2%                                                   | 20.7%                                         | 30.6% | 43.7% | 20.0% | 45.5% |  |
| TP                   | 4.89                                               | 2.14   | 1.67                                         | 1.08  | 0.48  | 0.19  | 30.5%                                                   | 23.9%                                         | 32.8% | 40.3% | 21.8% | 43.6% |  |
| LMS                  | 15.64                                              | 6.71   | 4.25                                         | 4.68  | 1.45  | 0.84  | 40.7%                                                   | 33.3%                                         | 44.7% | 47.5% | 30.5% | 49.5% |  |
|                      | Cl concentration [atoms cm <sup>-3</sup> ]         |        |                                              |       |       |       | Yield of CO from CH <sub>4</sub> oxidation   λ [C/C]    |                                               |       |       |       |       |  |
| SRF                  | 97                                                 | 56     | 145                                          | 47    | 8     | 10    | 72%                                                     | 72%                                           | 74%   | 62%   | 48%   | 51%   |  |
| BL                   | 100                                                | 59     | 152                                          | 51    | 8     | 11    | 81%                                                     | 83%                                           | 81%   | 73%   | 55%   | 62%   |  |
| MBL                  | 110                                                | 59     | 165                                          | 49    | 8     | 9     | 47%                                                     | 41%                                           | 45%   | 63%   | 103%  | 257%  |  |
| FT                   | 269                                                | 163    | 352                                          | 152   | 36    | 42    | 96%                                                     | 97%                                           | 95%   | 96%   | 98%   | 107%  |  |
| T                    | 261                                                | 157    | 345                                          | 146   | 35    | 40    | 93%                                                     | 95%                                           | 93%   | 93%   | 96%   | 104%  |  |
| TP                   | 3151                                               | 1415   | 4945                                         | 1418  | 299   | 506   | 123%                                                    | 119%                                          | 128%  | 121%  | 120%  | 120%  |  |
| LMS                  | 16172                                              | 15892  | 15630                                        | 17260 | 15301 | 20021 | 102%                                                    | 103%                                          | 101%  | 103%  | 103%  | 102%  |  |
|                      | CH <sub>4</sub> sink   S [Tg(C) yr <sup>-1</sup> ] |        |                                              |       |       |       | (via OH) [C/C]                                          |                                               |       |       |       |       |  |
| SRF                  | 7.0                                                | 1.1    | 5.2                                          | 0.69  | 0.01  | 0.01  | 99.9%                                                   | 99.9%                                         | 99.9% | 99.8% | 99.8% | 99.8% |  |
| BL                   | 49.2                                               | 7.9    | 36.1                                         | 5.1   | 0.07  | 0.06  | 99.9%                                                   | 99.9%                                         | 99.9% | 99.8% | 99.8% | 99.8% |  |
| MBL                  | 32.7                                               | 2.9    | 25.9                                         | 3.9   | 0.03  | 0.01  | 99.9%                                                   | 99.9%                                         | 99.9% | 99.8% | 99.8% | 99.8% |  |
| FT                   | 313.8                                              | 49.5   | 227.8                                        | 36.5  | 2.22  | 1.01  | 99.7%                                                   | 99.7%                                         | 99.7% | 99.7% | 99.7% | 99.6% |  |
| T                    | 372.7                                              | 59.2   | 270.6                                        | 42.8  | 2.32  | 1.09  | 99.7%                                                   | 99.7%                                         | 99.7% | 99.7% | 99.7% | 99.6% |  |
| TP                   | 1.83                                               | 0.59   | 0.74                                         | 0.50  | 0.07  | 0.05  | 90.9%                                                   | 94.2%                                         | 86.4% | 93.7% | 97.8% | 96.5% |  |
| LMS                  | 20.2                                               | 5.5    | 9.1                                          | 5.59  | 0.67  | 0.67  | 53.4%                                                   | 58.7%                                         | 47.9% | 57.1% | 64.7% | 60.4% |  |
|                      | (via O <sup>1</sup> D) [C/C]                       |        |                                              |       |       |       | (via Cl) [C/C]                                          |                                               |       |       |       |       |  |
| SRF                  | 0.01%                                              | 0.01%  | 0.01%                                        | 0.01% | 0.02% | 0.04% | 0.13%                                                   | 0.11%                                         | 0.13% | 0.14% | 0.14% | 0.19% |  |
| BL                   | 0.01%                                              | 0.02%  | 0.01%                                        | 0.01% | 0.02% | 0.05% | 0.13%                                                   | 0.12%                                         | 0.13% | 0.15% | 0.15% | 0.19% |  |
| MBL                  | 0.01%                                              | 0.01%  | 0.01%                                        | 0.01% | 0.02% | 0.03% | 0.14%                                                   | 0.13%                                         | 0.14% | 0.15% | 0.15% | 0.18% |  |
| FT                   | 0.07%                                              | 0.08%  | 0.07%                                        | 0.07% | 0.06% | 0.09% | 0.25%                                                   | 0.24%                                         | 0.25% | 0.27% | 0.22% | 0.30% |  |
| T                    | 0.06%                                              | 0.07%  | 0.06%                                        | 0.06% | 0.06% | 0.09% | 0.23%                                                   | 0.22%                                         | 0.23% | 0.25% | 0.22% | 0.29% |  |
| TP                   | 1.94%                                              | 1.13%  | 3.20%                                        | 1.05% | 0.38% | 0.40% | 7.2%                                                    | 4.7%                                          | 10.4% | 5.2%  | 1.8%  | 3.1%  |  |
| LMS                  | 33.0%                                              | 26.8%  | 40.3%                                        | 27.1% | 18.6% | 18.4% | 13.7%                                                   | 14.6%                                         | 11.8% | 15.8% | 16.7% | 21.2% |  |
| Domain abbreviations | zonal:                                             | GLOB   | Globe (90°S–90°N)                            |       |       |       | NH/SH                                                   | Northern/Southern Hemisphere                  |       |       |       |       |  |
|                      |                                                    | IT/ET  | Intra/Extra-Tropics (separated at 23.4°N/°S) |       |       |       | AR/AN                                                   | Arctic/Antarctic (above 66°N/°S)              |       |       |       |       |  |
|                      | vertical:                                          | SRF/TP | Surface (lowest model layer)                 |       |       |       | T                                                       | Troposphere (below the TP)                    |       |       |       |       |  |
|                      |                                                    | (M)BL  | (Marine) Boundary Layer                      |       |       |       | FT                                                      | Free Troposphere (above the BL, below the TP) |       |       |       |       |  |
|                      |                                                    | TP     | Tropopause                                   |       |       |       | LMS                                                     | Lowermost Stratosphere (above the TP)         |       |       |       |       |  |
